# Supplementary material for: Ophiostomatales Associated with Mediterranean Pine Engraver, Orthotomicus erosus (Coleoptera, Curculionidae) in Dalmatia, Croatia
Source: MDPI journal article supplement (doi:10.3390/jof8080788), 2022-07-28
Supplement: s1 [file s1]

Table S1. Results of the blast analysis and GenBank accession numbers used in the study

| Species                             | No. of isolates | DNA barcode used for identification              | GenBank Accession Number | Blast result (% Identity) | Accession Number of Reference Sequence |
|-------------------------------------|-----------------|--------------------------------------------------|--------------------------|---------------------------|----------------------------------------|
| <i>Ophiostoma ips</i>               | 30              | ITS                                              | ON697188                 | 99-100%                   | MH324814.1                             |
|                                     | 5               | $\beta$ -tubulin ( $\beta$ T)                    | ON736861                 | 98-100%                   | MT210369.1                             |
|                                     | 5               | elongation factor 1- $\alpha$ (TEF 1- $\alpha$ ) | ON736865                 | 95-100%                   | MG702098.1                             |
| <i>Sporothrix pseudoabietina</i>    | 9               | ITS                                              | ON697189                 | 99-100 %                  | KY568168                               |
|                                     | 9               | $\beta$ -tubulin ( $\beta$ T)                    | ON736862                 | 95-99 %                   | MW066390.1                             |
|                                     | 9               | elongation factor 1- $\alpha$ (TEF 1- $\alpha$ ) | ON736866                 | 99%                       | MW066432.1                             |
| <i>Ophiostoma piceae</i>            | 6               | ITS                                              | ON697190                 | 99-100%                   | AF493240                               |
|                                     | 6               | $\beta$ -tubulin ( $\beta$ T)                    | ON736863                 | 98-100%                   | AY789150.1                             |
|                                     | 6               | elongation factor 1- $\alpha$ (TEF 1- $\alpha$ ) | ON736867                 | 97-100%                   | MH283420.1                             |
| <i>Ophiostoma floccosum</i>         | 3               | ITS                                              | ON697191                 | 100%                      | JQ292830.1                             |
|                                     | 3               | $\beta$ -tubulin ( $\beta$ T)                    | ON736864                 | 100%                      | MH124251.1                             |
|                                     | 3               | elongation factor 1- $\alpha$ (TEF 1- $\alpha$ ) | ON736868                 | 100%                      | MH283416.1                             |
| <i>Graphilbum rectangulosporium</i> | 5               | ITS                                              | ON697192                 | 100%                      | KP691915.1                             |
| <i>Sarocladium strictum</i>         | 1               | ITS                                              | ON697193                 | 100%                      | MF497404.1                             |
